# Supplementary material
Source: MDPI journal article supplement (https://www.mdpi.com/2313-576X/6/2/31)
Supplement: s1 [file s1]

# Aquatic Competencies and Drowning Prevention in Children 2–4 Years: A Systematic Review

Danielle H. Taylor <sup>1,2,\*</sup>, Richard C. Franklin <sup>1,2</sup> and Amy E. Peden <sup>1,2,3</sup>

<sup>1</sup> College of Public Health, Medical and Veterinary Sciences, James Cook University, Townsville QLD 4810, Australia; richard.franklin@jcu.edu.au (R.C.F.); a.peden@unsw.edu.au (A.E.P.)

<sup>2</sup> Royal Life Saving Society—Australia, Broadway, Sydney NSW 2007, Australia

<sup>3</sup> College of Public Health and Community Medicine, University of New South Wales, Sydney NSW 2033, Australia

\* Correspondence: danielle.taylor@my.jcu.edu.au

Received: 19 February 2020; Accepted: 15 June 2020; Published: date

**Table S1.** Search methodology including databases and search terms used.

| Search Number | Search Term                                              |
|---------------|----------------------------------------------------------|
| Medline       |                                                          |
| 1             | Drown* (no limits)                                       |
| 2             | Drown* with limits of English language, human, 1930-2019 |
| 3             | Competency* (no limits)                                  |
| 4             | Skill* (no limits)                                       |
| 5             | Intervention (no limits)                                 |
| 6             | Prevention (no limits)                                   |
| 7             | Swim* (no limits)                                        |
| 8             | Combined 2–7 OR                                          |
| 9             | Combined 8 AND 2                                         |
| PUBMED        |                                                          |
| 1             | Drown* (no limits)                                       |
| 2             | Drown* with limits of English language, human, 1930-2019 |
| 3             | Competency* (no limits)                                  |

- 4 Skill\* (no limits)
- 5 Intervention (no limits)
- 6 Prevention (no limits)
- 7 Swim\* (no limits)
- 8 Combined 2–7 OR
- 9 Combined 8 AND 2

#### Scopus

TITLE-ABS-KEY ( drown\* ) AND PUBYEAR > 1930 AND PUBYEAR < 2019 AND (TITLE-ABS-KEY (competency\*) OR TITLE-ABS-KEY (skill\*) OR TITLE-ABS-KEY (intervention) OR TITLE-ABS-KEY (prevention) OR TITLE-ABS-KEY (swim\*))

#### PsychInfo

Drown\* and competency\* OR skill\* OR intervention\* OR prevention OR swim\* (no limits)

Drown\* and competency\* OR skill\* OR intervention\* OR prevention OR swim\* (limited to Peer reviewed and 1 January 1930 to 31 July 2019)

Drown\* and competency\* OR skill\* OR intervention\* OR prevention OR swim\* (limited to Peer reviewed and 1 January 1930 to 31 July 2019 and human and English language)  
OR Drown\* AND (child\* OR swim\* OR skill\* OR prevention)

#### Sports Discus

Drown\* (TX All Text) AND competency\* OR skill\* OR intervention\* OR prevention\* OR swim\*(TX All Text) limits to (1 January 1930 to 31 July 2019). Language English. Search modes—BooleanPhrase

#### Cochrane.org

The term swim was entered which produced 21 papers, and the term swim was entered which produced 28 papers.

#### Embase

Drown\* (TX All Text) AND competency\* OR skill\* OR intervention\* OR prevention\* OR swim\*(TX All Text) limits to (1 January 1930 to 31 July 2019). Language English. Search modes—BooleanPhrase

---

\* include all derivatives of a word for search string results.

Table S2. List of references deemed relevant to study design of systematic literature review.

---

#### Reference

---

Anderson, D.I.; Rodriguez, A. Is There an Optimal Age for Learning to Swim? *J. Mot. Learn. Dev.* **2014**, *2*, 80–89. [52]

---

- Bugeja, L.; Franklin, R.C. An analysis of stratagems to reduce drowning deaths of young children in private swimming pools and spas in Victoria, Australia. *Int. J. Inj. Control Saf. Promot.* **2013**, *20*, 282–294. [53]
- Costa, A.; Marinho, D.; Rocha, H.; Silva, A.; Barbosa, T.; Ferreira, S.; Martins, M. Deep and shallow water effects on developing preschoolers' aquatic skills. *J. Hum. Kinet.* **2012**, *32*, 211–219. [54]
- Brenner, R.A.; Taneja, G.S.; Haynie, D.L.; Trumble, A.C.; Qian, C.; Klinger, R.M.; Klebanoff, M.A. Association between swimming lessons and drowning in childhood: A case-control study. *Arch. Pediatr. Adolesc. Med.* **2009**, *163*, 203–210. [55]
- Yang L, Nong QQ, Li CL, Feng QM, Lo SK. Risk factors for childhood drowning in rural regions of a developing country: A case-control study. *Inj. Prev.* **2007**, *13*, 178–182. [56]
- Parker HE, Blanksby BA. Starting age and aquatic skill learning in young children: Mastery of prerequisite water confidence and basic aquatic locomotion skills. *Aust. J. Sci. Med. Sport* **1997**, *29*, 83–7. [57]
- Asher, K.N.; Rivara, F.P.; Felix, D.; Vance, L.; Dunne, R. Water safety training as a potential means of reducing risk of young children's drowning. *Inj. Prev.* **1995**, *1*, 228–233. [58]
- Blanksby, B.A.; Parker, H.E.; Bradley, S.; Ong, V. Children's readiness for learning front crawl swimming. *Aust. J. Sci. Med. Sport* **1995**, *27*, 34–37. [59]
- Rodgers, G.B. Factors contributing to child drownings and near-drownings in residential swimming pools. *Hum. Factors* **1989**, *31*, 123–132. [60]
- Erbaugh, S.J. Effects of aquatic training on swimming skill development of preschool children. *Percept. Mot. Skills* **1986**, *62*, 439–446. [61]
- McGraw, M.B. Swimming behavior of the human infant. *J. Pediatr.* **1939**, *19*, 485–490. [62]
-

Table S3: Detailed Water Competencies.

| Water Competency                                                                                                                                                 | Anderson & Rodriguez [53] | Asher et al. [59] | Blanksby et al. [60] | Brenner et al. [56] | Bugeja & Franklin [54] | Costa et al. [55] | Erbaugh [62] | McGraw [63] | Olaisen et al. [52] | Parker & Blanksby [58] |
|------------------------------------------------------------------------------------------------------------------------------------------------------------------|---------------------------|-------------------|----------------------|---------------------|------------------------|-------------------|--------------|-------------|---------------------|------------------------|
| Deck behaviour                                                                                                                                                   |                           | X                 |                      |                     |                        |                   |              |             |                     |                        |
| Out of water safety behaviour (deck behaviour—e.g., running around pool, pushing others, entering water without an adult).                                       |                           |                   |                      |                     |                        |                   |              |             |                     |                        |
| Jump and swim                                                                                                                                                    |                           | X                 |                      |                     |                        |                   |              |             |                     |                        |
| Water recover                                                                                                                                                    |                           | X                 |                      |                     |                        |                   |              |             |                     |                        |
| Swimming ability                                                                                                                                                 |                           | X                 |                      |                     |                        |                   |              |             |                     |                        |
| (face underwater, recover from prone, roll back to front, propulsive kicking, beginner stroke, independently enter and exit pool, jump into pool independently). |                           |                   |                      |                     |                        |                   |              |             |                     |                        |
| In-water safety skills                                                                                                                                           |                           | X                 |                      |                     |                        |                   |              |             |                     |                        |
| (water recovery ability to stand up when dropped from above water and ability to jump in and swim to edge of pool).                                              |                           |                   |                      |                     |                        |                   |              |             |                     |                        |
| Safety skills                                                                                                                                                    |                           |                   |                      |                     |                        |                   |              |             | X                   |                        |

|                                                                                                                         |   |   |  |   |  |   |   |   |
|-------------------------------------------------------------------------------------------------------------------------|---|---|--|---|--|---|---|---|
| Bounces off pool bottom in 3 feet of water at least 2 times in a row                                                    |   |   |  |   |  |   |   | X |
| Listens + waits + shows respects for all students and teachers                                                          |   |   |  |   |  |   |   | X |
| Bobs bouncing controlled off pool bottom, 10 x 3 feet depth, arms at sides                                              |   |   |  |   |  |   |   | X |
| Demonstrates simple rescue: identifies urgency, exits pool, finds noodle, and reach assist                              |   |   |  |   |  |   |   | X |
| Bobs bouncing controlled off pool bottom 10 x 5 feet depth in streamline glide arms overhead                            |   |   |  |   |  |   |   | X |
| Goes willingly with teacher without parents' assistance                                                                 |   |   |  |   |  |   |   | X |
| Entry                                                                                                                   | X | X |  | X |  | X | X | X |
| Water entry                                                                                                             |   |   |  |   |  | X |   |   |
| Feet-first entry                                                                                                        |   |   |  |   |  | X |   |   |
| Head-first entry                                                                                                        |   |   |  |   |  | X |   |   |
| Jump into water                                                                                                         | X |   |  |   |  |   |   |   |
| Can jump in by means of pencil dive (feet first- held together)                                                         | X |   |  |   |  |   |   | X |
| Dive head first into water from pool deck                                                                               | X |   |  |   |  |   |   |   |
| Jump: enter pool foot first by climbing down ladder or jumping into the water and propelling self to examiner, 18 tasks |   | X |  |   |  |   | X |   |

|                                                                                                             |   |   |   |   |  |   |   |   |     |
|-------------------------------------------------------------------------------------------------------------|---|---|---|---|--|---|---|---|-----|
| Enters wading pool (<2 feet) on own will                                                                    |   |   |   |   |  |   | X |   |     |
| Enters pool safely no diving at all times                                                                   |   |   |   |   |  |   | X |   |     |
| Enters big pool safely 25 yards, 6 lanes<br>on own will                                                     |   |   |   |   |  |   | X |   |     |
| In 6 feet depth demonstrates kneeling<br>dive with hands above head interlocked                             |   |   |   |   |  |   | X |   |     |
| Diving: Enter pool head first and propel<br>self to instructor                                              |   | X |   |   |  | X |   | X |     |
| Exit                                                                                                        |   | X |   |   |  |   |   | X |     |
| Exit pool without assistance using<br>ladder                                                                |   |   |   |   |  |   |   | X |     |
| Demonstrates ability to pull themselves<br>out of water to exit (not using ladder to<br>exit)               |   |   |   |   |  |   |   | X |     |
| Submersion                                                                                                  | X | X | X | X |  |   |   | X | X X |
| Breath control - immersion of the face<br>and eye opening                                                   |   |   |   |   |  | X |   |   |     |
| Deepwater immersion                                                                                         |   |   |   |   |  | X |   |   |     |
| Submerging:complete submersion with<br>or without hesitation                                                |   |   | X |   |  |   |   |   | X   |
| Swim underwater for 16 ft                                                                                   | X |   |   |   |  |   |   |   |     |
| Swim underwater and retrieve rings<br>from depth of 6 ft                                                    | X |   |   |   |  |   |   |   |     |
| Ring pick-up: Stand independently in<br>shallow (chest deep) water and grasp a<br>ring placed near the feet |   | X |   |   |  |   |   | X |     |

|                                                                           |   |   |   |   |   |   |   |   |   |   |   |
|---------------------------------------------------------------------------|---|---|---|---|---|---|---|---|---|---|---|
| Hold breath for 3 seconds with entire head submerged                      |   |   |   |   |   |   |   |   |   | X |   |
| Demonstrates comfort with keeping face below water surface for 15 seconds |   |   |   |   |   |   |   |   |   | X |   |
| Holds breath fully submerged body and head 10 seconds                     |   |   |   |   |   |   |   |   |   | X |   |
| Submerged in prone position without support                               |   |   |   |   |   |   |   |   | X |   |   |
| Submerged supine position without support                                 |   |   |   |   |   |   |   |   | X |   |   |
| Water familiarisation                                                     | X | X | X | X | X | X | X | X | X | X | X |
| Water orientation and adjustment at vertical position                     |   |   |   |   |   |   | X |   | X |   |   |
| Water teaching confidence, be totally happy in water                      |   |   | X |   |   |   |   |   |   |   | X |
| Put head in water without goggles                                         | X |   |   |   |   |   |   |   |   |   |   |
| Breath control                                                            | X | X | X |   |   |   |   | X |   | X | X |
| Blows bubbles with mouth and chin below water surface                     |   |   |   |   |   |   |   |   |   | X |   |
| Blowing bubbles with whole face below water surface                       |   |   | X |   |   |   |   |   |   |   | X |
| Body position                                                             |   | X | X |   |   | X | X | X | X |   |   |
| Body position at ventral gliding                                          |   |   |   |   |   | X |   |   |   |   |   |
| Body position at dorsal gliding                                           |   |   |   |   |   | X |   |   |   |   |   |
| Body position at longitudinal rotation in gliding                         |   |   |   |   |   | X |   |   |   |   |   |

|                                                                                            |   |   |   |   |  |   |   |   |   |
|--------------------------------------------------------------------------------------------|---|---|---|---|--|---|---|---|---|
| Body position at front and back somersaults                                                |   |   |   |   |  | X |   |   |   |
| Locomotion back float: stretched body                                                      |   |   | X |   |  |   |   |   | X |
| Front float: stretched body                                                                |   |   | X |   |  |   |   |   | X |
| Tread ater                                                                                 | X |   |   |   |  |   |   | X |   |
| Tread water for 1 min                                                                      | X |   |   |   |  |   |   |   |   |
| Sculling movements with hands/arms while floating on back                                  | X |   |   |   |  |   |   |   |   |
| Buoyancy/Flotation                                                                         |   | X | X | X |  | X | X |   | X |
| Horizontal buoyancy                                                                        |   |   |   |   |  |   |   |   |   |
| vertical buoyancy at deep water                                                            |   |   |   |   |  | X |   |   |   |
| Buoyancy: able to kick with kickboard by self with or without bubble                       |   |   |   |   |  | X |   |   |   |
| Pencil glide (feet together, arms over head), assisted, face down, with push-off from wall |   |   |   | X |  |   |   |   | X |
| Flutter kick on back, back of head resting in water, with feet in water (assisted)         |   |   |   |   |  |   |   | X |   |
| Demonstrating parallel position with hands at waist (aka dolphin pulls), on tummy          |   |   |   |   |  |   |   | X |   |
| Floating on back, head rested parallel, 5 seconds assisted                                 |   |   |   |   |  |   |   | X |   |
| Straddling noodle, feet off pool bottom, and balancing for 15 sec                          |   |   |   |   |  |   |   | X |   |



|                                                                                                                                                          |   |
|----------------------------------------------------------------------------------------------------------------------------------------------------------|---|
| Glide off wall, face down, streamline,<br>until no more forward movement min 4<br>yards                                                                  | X |
| Demonstrate flutter kicking with<br>kickboard, on tummy, in streamline<br>position with face down, 10 yards                                              | X |
| Scullinghand propeller movement,<br>arms at side 10 yards from shallow to<br>deep end                                                                    | X |
| 10 arms rotations, with choice of<br>freestyle or backstroke with or without<br>breathing                                                                | X |
| Demonstrates ability to float on tummy<br>face down, for 20 sec minimum                                                                                  | X |
| Vertically floating with kickboard at<br>chest 20 seconds                                                                                                | X |
| Floats on back without forward motion<br>minimal use of arms and legs for 30<br>seconds                                                                  | X |
| From push off streamline with flutter<br>kick past 5 yards kicking to surface and<br>swims freestyle                                                     | X |
| Initiates body roll: <ul style="list-style-type: none"> <li>rotation from tummy to back<br/>using flutter kick</li> <li>floating horizontally</li> </ul> | X |

|                                                                                      |   |   |   |  |  |   |   |  |   |   |
|--------------------------------------------------------------------------------------|---|---|---|--|--|---|---|--|---|---|
| Asynchronous sculling with arms at waist, face down aka propeller hands 10 yards min |   |   |   |  |  |   |   |  | X |   |
| Rotates from face down to face up pauses and reverse floating horizontally           |   |   |   |  |  |   |   |  | X |   |
| Treads water for 15 seconds in 6 feet depth, not using arms at any point             |   |   |   |  |  |   |   |  | X |   |
| Kicking                                                                              | X | X | X |  |  | X | X |  | X | X |
| Leg kick with breath                                                                 |   |   |   |  |  | X |   |  |   |   |
| Control at ventral body position, with flutter                                       |   |   |   |  |  |   |   |  |   |   |
| Boards                                                                               |   |   |   |  |  |   |   |  |   |   |
| Without flutter boards                                                               |   |   |   |  |  | X |   |  |   |   |
| leg kick with breath control at dorsal                                               |   |   |   |  |  | X |   |  |   |   |
| body position with flutter boards                                                    |   |   |   |  |  |   |   |  |   |   |
| Without flutter boards                                                               |   |   |   |  |  | X |   |  |   |   |
| Kicking with board 10m:                                                              |   |   | X |  |  |   |   |  |   | X |
| • back and front                                                                     |   |   |   |  |  |   |   |  |   |   |
| • on front and incorporating breathing                                               |   |   |   |  |  |   |   |  |   |   |
| • lifting head up and down, while keeping shoulders in water                         |   |   |   |  |  |   |   |  |   |   |
| Kicking on back (10m), Good body position, arms by side                              |   |   | X |  |  |   |   |  |   |   |

|                                                                                                     |   |   |   |   |
|-----------------------------------------------------------------------------------------------------|---|---|---|---|
| Breaststroke on back with board (5m) - Looking for feet turned out feet than propulsion.            | X |   |   |   |
| Make forward progress in prone while approximating butterfly kick                                   | X |   |   |   |
| Endurance                                                                                           | X | X |   | X |
| Flutter kicking on back with kickboard assisted at chest, 5 yards                                   |   |   |   | X |
| Demonstrating 5 big arm rotations on tummy (arms fully out of water) – face down                    |   |   |   | X |
| From centre of pool swims back any stroke to wall mini 10 yards                                     |   |   |   | X |
| 5 feet depth swims underrate along pool bottom 10 feet minimum                                      |   |   |   | X |
| While swimming freestyle demonstrates appropriate hip and shoulder roll with side breathing 3 x min |   |   |   | X |
| Demonstrates 20 yards freestyle with finger /writs a forearm entry in front of head                 |   |   |   | X |
| Horizontal supported in water head above water level                                                |   |   |   | X |
| Locomotion: Front maintain a prone position and propel self with or without                         | X |   | X |   |



Preferred side breathing (ear parallel  
with shoulder blade)

Swim front crawl for 38 ft with better  
control than Level 2

X

Swim backstroke for 38 ft

X
